# Supplementary material for: Can hysterosalpingo-foam sonography replace hysterosalpingography as first-choice tubal patency test? A randomized non-inferiority trial
Source: PubMed Central journal article supplement — Hum Reprod. 2022 Feb 27;37(5):969–79. doi: 10.1093/humrep/deac034 (PMC9071226; doi:10.1093/humrep/deac034), 2022-02-27
Supplement: deac034_supplementary_table_si.pdf [file deac034_supplementary_table_si.pdf]

**Supplementary Table SI CORE outcomes.**

|                                                        |                                                                                                                                                       |
|--------------------------------------------------------|-------------------------------------------------------------------------------------------------------------------------------------------------------|
| <b>Ongoing pregnancy</b>                               | An intrauterine pregnancy with a heartbeat during ultrasound examination between 10 and 12 weeks of pregnancy                                         |
| <b>Live birth</b>                                      | A live birth after 24 weeks of gestation                                                                                                              |
| <b>Concordance between HyFoSy and HSG</b>              | Agreement analysis                                                                                                                                    |
| <b>Pain score</b>                                      | Measured by VAS; ranging from 0.0 to 10.0 cm                                                                                                          |
| <b>Time to ongoing pregnancy leading to live birth</b> | Calculated from 4 weeks before the first performed test to first day of menstruation before conceiving an ongoing pregnancy leading to live birth     |
| <b>Biochemical pregnancy</b>                           | A positive pregnancy test or an increase in human chorionic gonadotropin combined with menstrual bleeding and absence of ultrasound visible pregnancy |
| <b>Miscarriage</b>                                     | The presence of non-vitality on ultrasound or spontaneous loss of pregnancy                                                                           |
| <b>Ectopic pregnancy</b>                               | An embryo implanted outside the uterine cavity                                                                                                        |
| <b>Multiple pregnancy</b>                              | A pregnancy of two or more foetuses                                                                                                                   |
| <b>Preterm birth</b>                                   | A delivery before 37 weeks of pregnancy                                                                                                               |

HyFoSy, hysterosalpingo-foam sonography; HSG, hysterosalpingography; VAS, Visual Analogue Scale.
