# Supplementary material for: Can hysterosalpingo-foam sonography replace hysterosalpingography as first-choice tubal patency test? A randomized non-inferiority trial
Source: PubMed Central journal article supplement — Hum Reprod. 2022 Feb 27;37(5):969–79. doi: 10.1093/humrep/deac034 (PMC9071226; doi:10.1093/humrep/deac034), 2022-02-27
Supplement: deac034_supplementary_table_sii.pdf [file deac034_supplementary_table_sii.pdf]

**Supplementary Table SII** Comparison between hysterosalpingo-foam sonography (HyFoSy) result and hysterosalpingography (HSG) result, allocated order HyFoSy-HSG (n = 521).

|        |                              | HSG       |                           |                              |              | Total      |
|--------|------------------------------|-----------|---------------------------|------------------------------|--------------|------------|
|        |                              | Normal    | One-sided tubal pathology | Double-sided tubal pathology | Inconclusive |            |
| HyFoSy | Normal                       | 370 (71%) | 27 (5%)                   | 6 (1%)                       | 12 (2%)      | 415 (80%)  |
|        | One-sided tubal pathology    | 20 (4%)   | 16 (3%)                   | 3 (1%)                       | -            | 39 (8%)    |
|        | Double-sided tubal pathology | 6 (1%)    | 5 (1%)                    | 3 (1%)                       | 1 (0%)       | 15 (3%)    |
|        | Inconclusive                 | 41 (8%)   | 4 (1%)                    | 1 (0%)                       | 6 (1%)       | 52 (10%)   |
| Total  |                              | 437 (84%) | 52 (10%)                  | 13 (3%)                      | 19 (4%)      | 521 (100%) |

The completed tests are indicated by the dashed line. Concordance between HyFoSy and HSG is shown in the diagonal blue boxes; discordance between HyFoSy and HSG is illustrated in red; inconclusive is illustrated in italic.
