# Supplementary material for: Can hysterosalpingo-foam sonography replace hysterosalpingography as first-choice tubal patency test? A randomized non-inferiority trial
Source: PubMed Central journal article supplement — Hum Reprod. 2022 Feb 27;37(5):969–79. doi: 10.1093/humrep/deac034 (PMC9071226; doi:10.1093/humrep/deac034), 2022-02-27
Supplement: deac034_supplementary_table_siii.pdf [file deac034_supplementary_table_siii.pdf]

**Supplementary Table SIII** Comparison between hysterosalpingo-foam sonography (HyFoSy) result and hysterosalpingography (HSG) result, allocated order HSG-HyFoSy (n = 505).

|        |                              | HSG       |                           |                              |              | Total      |
|--------|------------------------------|-----------|---------------------------|------------------------------|--------------|------------|
|        |                              | Normal    | One-sided tubal pathology | Double-sided tubal pathology | Inconclusive |            |
| HyFoSy | Normal                       | 332 (66%) | 25 (5%)                   | 4 (1%)                       | 15 (3%)      | 376 (75%)  |
|        | One-sided tubal pathology    | 26 (5%)   | 19 (4%)                   | 4 (1%)                       | 2 (0%)       | 51 (10%)   |
|        | Double-sided tubal pathology | 13 (3%)   | 4 (1%)                    | 7 (1%)                       | -            | 24 (5%)    |
|        | Inconclusive                 | 47 (9%)   | 4 (1%)                    | -                            | 3 (1%)       | 54 (11%)   |
| Total  |                              | 418 (83%) | 52 (10%)                  | 15 (3%)                      | 20 (4%)      | 505 (100%) |

The completed tests are indicated by the dashed line. Concordance between HyFoSy and HSG is shown in the diagonal blue boxes; discordance between HyFoSy and HSG is illustrated in red; inconclusive is illustrated in italic.
