# Supplementary material for: Can hysterosalpingo-foam sonography replace hysterosalpingography as first-choice tubal patency test? A randomized non-inferiority trial
Source: PubMed Central journal article supplement — Hum Reprod. 2022 Feb 27;37(5):969–79. doi: 10.1093/humrep/deac034 (PMC9071226; doi:10.1093/humrep/deac034), 2022-02-27
Supplement: deac034_supplementary_table_siv.pdf [file deac034_supplementary_table_siv.pdf]

**Supplementary Table SIV Fertility management.**

| <b>Fertility management</b>                | <b>Discordant results management based on HyFoSy (n = 54)</b> | <b>Discordant results management based on HSG (n = 51)</b> | <b>P-value</b> |
|--------------------------------------------|---------------------------------------------------------------|------------------------------------------------------------|----------------|
| Prognosis for natural conception (%)       | 35.0 (27.0–40.0) <sup>a</sup>                                 | 31.8 (26.1–47.0) <sup>a</sup>                              | 0.564          |
| Expectant management                       | 14 (26)                                                       | 21 (41)                                                    | 0.098          |
| Ovulation induction                        | 6 (11)                                                        | 6 (12)                                                     | 0.916          |
| Ovulation induction followed by IUI or IVF | 3 (6)                                                         | 1 (2)                                                      | 0.360          |
| IUI with or without hormone stimulation    | 20 (37)                                                       | 17 (33)                                                    | 0.691          |
| IUI followed by IVF/ICSI                   | 8 (15)                                                        | 3 (6)                                                      | 0.135          |
| IVF/ICSI                                   | 3 (6)                                                         | 3 (6)                                                      | 0.943          |
| Laparoscopy                                | 4 (7.4)                                                       | 6 (11.8)                                                   | 0.447          |

Data are medians (IQRs) or n (%), unless otherwise indicated.

<sup>a</sup>Data on Hunault score were available for 39 versus 32 women.

HyFoSy, hysterosalpingo-foam sonography; HSG, hysterosalpingography.
