# Supplementary material for: Can hysterosalpingo-foam sonography replace hysterosalpingography as first-choice tubal patency test? A randomized non-inferiority trial
Source: PubMed Central journal article supplement — Hum Reprod. 2022 Feb 27;37(5):969–79. doi: 10.1093/humrep/deac034 (PMC9071226; doi:10.1093/humrep/deac034), 2022-02-27
Supplement: deac034_supplementary_table_sv.pdf [file deac034_supplementary_table_sv.pdf]

**Supplementary Table SV Serious adverse events.**

|          |                                                                                                                                                                                                                                                                                                                                                                                                                                                                                                                                                                                                                                                                                                                                                                                                                                                           |
|----------|-----------------------------------------------------------------------------------------------------------------------------------------------------------------------------------------------------------------------------------------------------------------------------------------------------------------------------------------------------------------------------------------------------------------------------------------------------------------------------------------------------------------------------------------------------------------------------------------------------------------------------------------------------------------------------------------------------------------------------------------------------------------------------------------------------------------------------------------------------------|
| Infant   | <p>Eight women delivered a child with a congenital anomaly (0.8%)</p> <ul style="list-style-type: none"><li>• Anal atresia, vaginal septum and neurogenic bladder with vesico-ureteric reflux, underwent successful surgery</li><li>• Bilateral ear malformations with hearing loss</li><li>• Giant omphalocele, deceased</li><li>• EBSTEIN anomaly, deceased</li><li>• Multiple congenital anomalies (penoscrotal hypospadias, cerebral ventriculomegaly and suspected growth hormone deficiency), development delay</li><li>• Congenital melanocytic nevus, which covered the majority of the lower back to right thigh and inguinal regions, follow-up at paediatrician</li><li>• Transposition of the great arteries with ventricular septal defect, underwent successful surgery</li><li>• Bronchogenic cyst, underwent successful surgery</li></ul> |
| Maternal | <p>One ectopic pregnancy needing a laparoscopic unilateral salpingectomy<br/>One ectopic pregnancy treated with methotrexate<br/>One cardiac arrest after spinal anaesthesia administered for caesarean section, uncomplicated recovery<br/>One breast cancer, needing treatment with unknown recovery<br/>One lymphoma, needing treatment with unknown recovery</p>                                                                                                                                                                                                                                                                                                                                                                                                                                                                                      |
